# Supplementary material for: Mutual Effect of Gypsum and Potassium on Nutrient Productivity in the Alfalfa–Grass Sward—A Case Study
Source: MDPI journal article supplement (doi:10.3390/plants12122250), 2023-06-08
Supplement: s1 [file s1]

## Supplement

Table S1. The dependence between the content of nutrients in the sward of the alfalfa–grass mixture and total yield,  $n = 30$ .

| No. | Trait | Equation               | R <sup>2</sup> | <i>p</i>     |
|-----|-------|------------------------|----------------|--------------|
| 1   | K1    | $K1 = 10.3TY - 47.1$   | 0.60           | $\leq 0.001$ |
| 2   | K2    | $K2 = 5.45TY + 25.3$   | 0.36           | $\leq 0.001$ |
| 3   | K3    | $K3 = 20.7TY - 172.9$  | 0.77           | $\leq 0.001$ |
| 4   | Mg1   | $Mg1 = 0.71TY + 1.83$  | 0.83           | $\leq 0.001$ |
| 5   | Mg2   | $Mg2 = 0.49TY + 6.36$  | 0.23           | $\leq 0.01$  |
| 6   | Mg3   | $Mg3 = 1.56TY + 8.22$  | 0.65           | $\leq 0.001$ |
| 7   | Ca1   | $Ca1 = -1.63TY + 50.1$ | 0.13           | $\leq 0.05$  |
| 8   | Ca2   | $Ca2 = 2.89TY + 2.85$  | 0.07           | ns           |
| 9   | Ca3   | $Ca3 = 4.22TY - 30.9$  | 0.30           | $\leq 0.01$  |
| 10  | Fe1   | $F1 = 22TY - 116.2$    | 0.48           | $\leq 0.001$ |
| 11  | Fe2   | $F2 = 9.26TY - 65.6$   | 0.20           | $\leq 0.01$  |
| 12  | Fe3   | $F3 = 21.1TY - 101.9$  | 0.57           | $\leq 0.001$ |
| 13  | Mn1   | $Mn1 = 4.7TY + 17.6$   | 0.46           | $\leq 0.001$ |
| 14  | Mn2   | $Mn2 = 2.35TY + 87.1$  | 0.01           | ns           |
| 15  | Mn3   | $Mn3 = 8.38TY - 1,27$  | 0.48           | ns           |
| 16  | Zn1   | $Zn1 = 4.65TY + 35$    | 0.21           | $\leq 0.01$  |
| 17  | Zn2   | $Zn2 = -0.73TY + 95.8$ | 0.01           | ns           |
| 18  | Zn3   | $Zn3 = 17.4TY - 134.5$ | 0.60           | $\leq 0.001$ |
| 19  | Cu1   | $Cu1 = 0.35TY + 13.7$  | 0.02           | ns           |
| 20  | Cu2   | $Cu2 = 0.12TY + 18.8$  | 0.01           | ns           |
| 21  | Cu2   | $Cu3 = 2.05TY - 8.7$   | 0.62           | $\leq 0.001$ |

$p < 0.001$ ,  $p < 0.01$ , and  $p < 0.05$ , respectively; ns – non-significant; Legend: K, Mg, Ca, Fe, Mn, Zn, Cu – nutrients; 1, 2, 3 – successive cuts; TY – total sward yield.

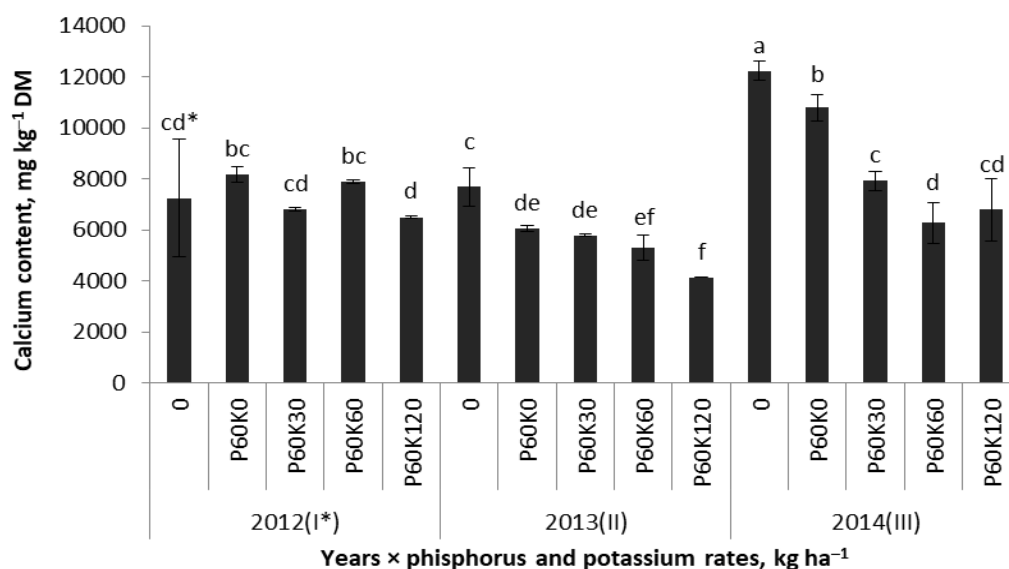

**Figure S1.** Effect of phosphorus/potassium rates in successive seasons on the content of Ca in the first cut of the alfalfa–grass mixture. \*Similar letters indicate a lack of significant differences using Tukey's test. The vertical bar in the column refers to the standard error of the mean; \*first main season of the sward use.

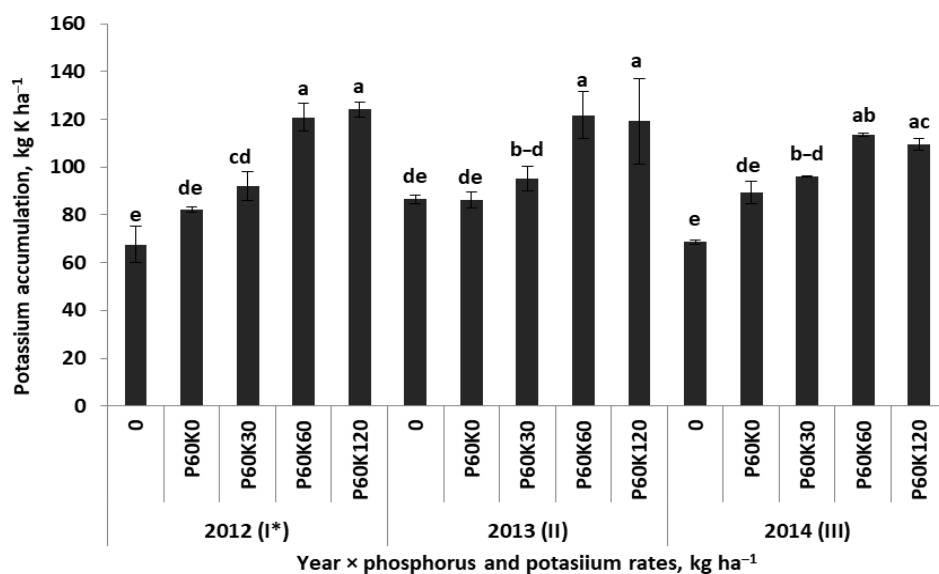

**Figure S2.** Effect of phosphorus/potassium rates in successive seasons on the accumulation of K in the second cut of the alfalfa–grass mixture. <sup>a</sup>Similar letters indicate a lack of significant differences using Tukey’s test. The vertical bar in the column refers to the standard error of the mean; \*first main season of the sward use.

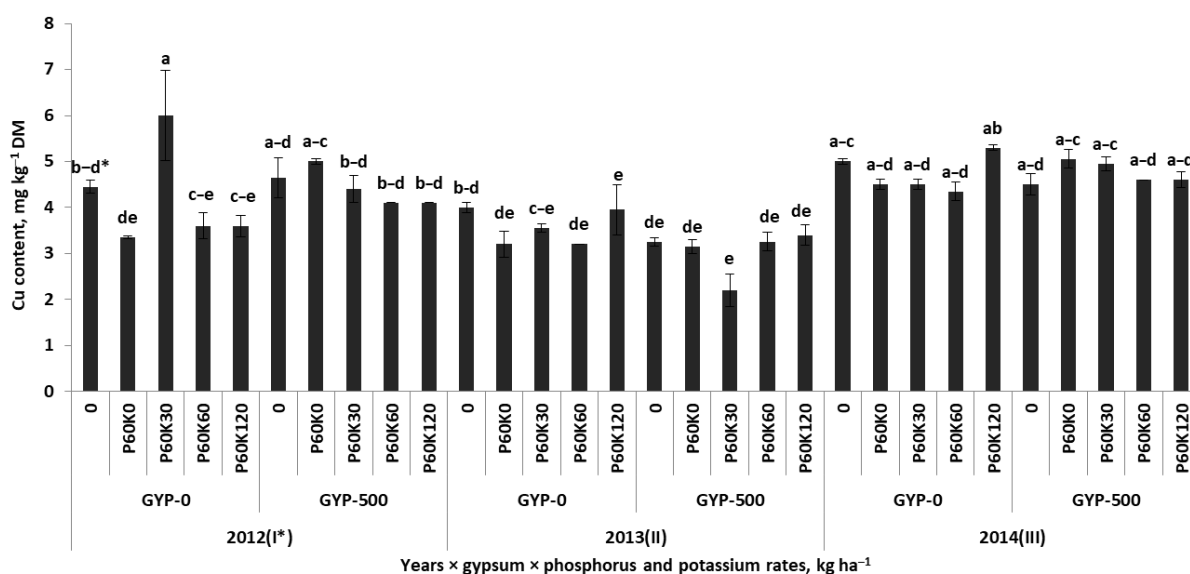

**Figure S3.** Effect of phosphorus/potassium rates in successive years on the content of copper in the third cut of the sward of the alfalfa–grass mixture. <sup>a</sup>Similar letters indicate a lack of significant differences using Tukey’s test. The vertical bar in the column refers to the standard error of the mean; \*first main season of the sward use.

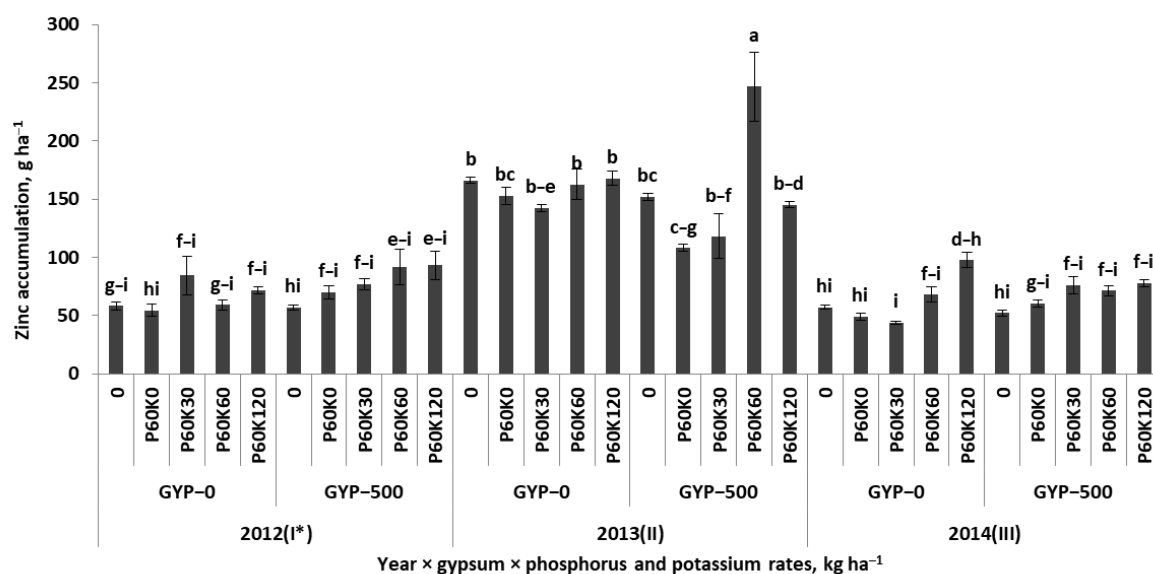

**Figure S4.** Effect of the interaction of gypsum and phosphorus/potassium rates in successive years on the accumulation of Zn in the third cut of the alfalfa–grass mixture. \*Similar letters indicate a lack of significant differences using Tukey’s test. The vertical bar in the column refers to the standard error of the mean; \*first main season of the sward use.

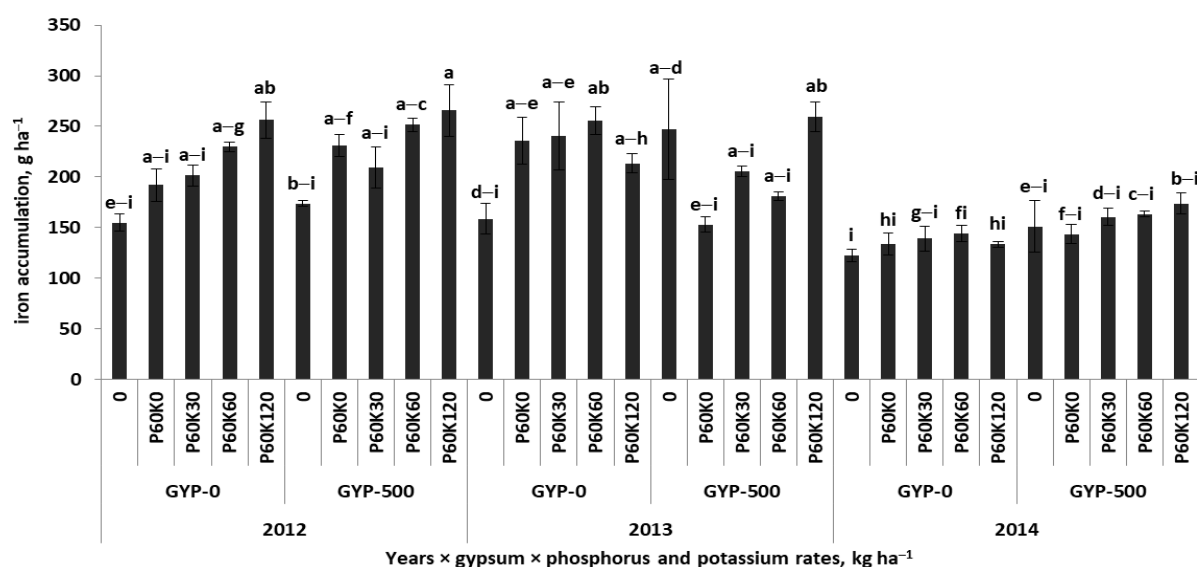

**Figure S5.** Effect of the interaction of gypsum and phosphorus/potassium rates in successive years on the accumulation of Fe in the second cut of the alfalfa–grass mixture. \*Similar letters indicate a lack of significant differences using Tukey’s test. The vertical bar in the column refers to the standard error of the mean; \*first main season of the sward use.

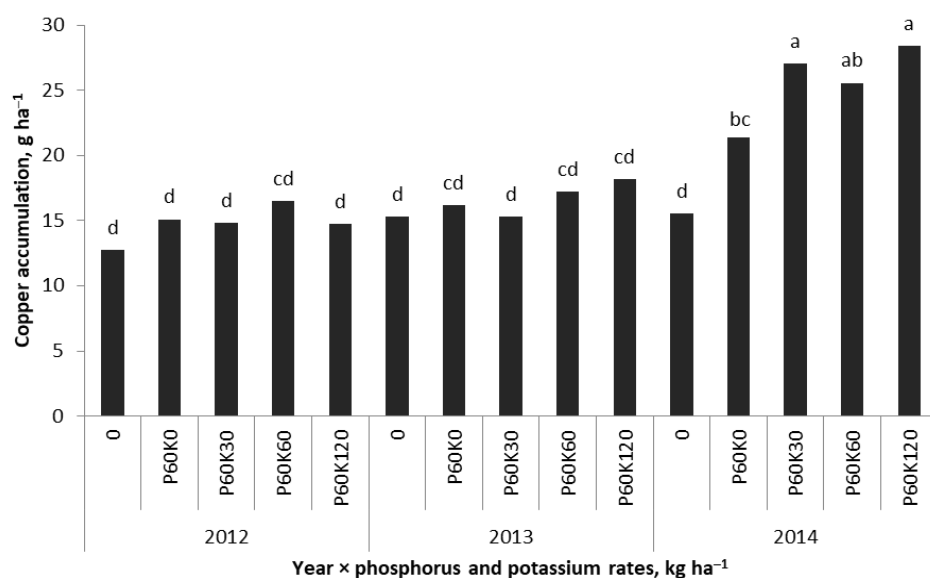

**Figure S6.** Effect of phosphorus/potassium rates in successive years on the accumulation of copper in the first cut of the alfalfa–grass mixture. \*Similar letters indicate a lack of significant differences using Tukey’s test. The vertical bar in the column refers to the standard error of the mean; \*first main season of the sward use.

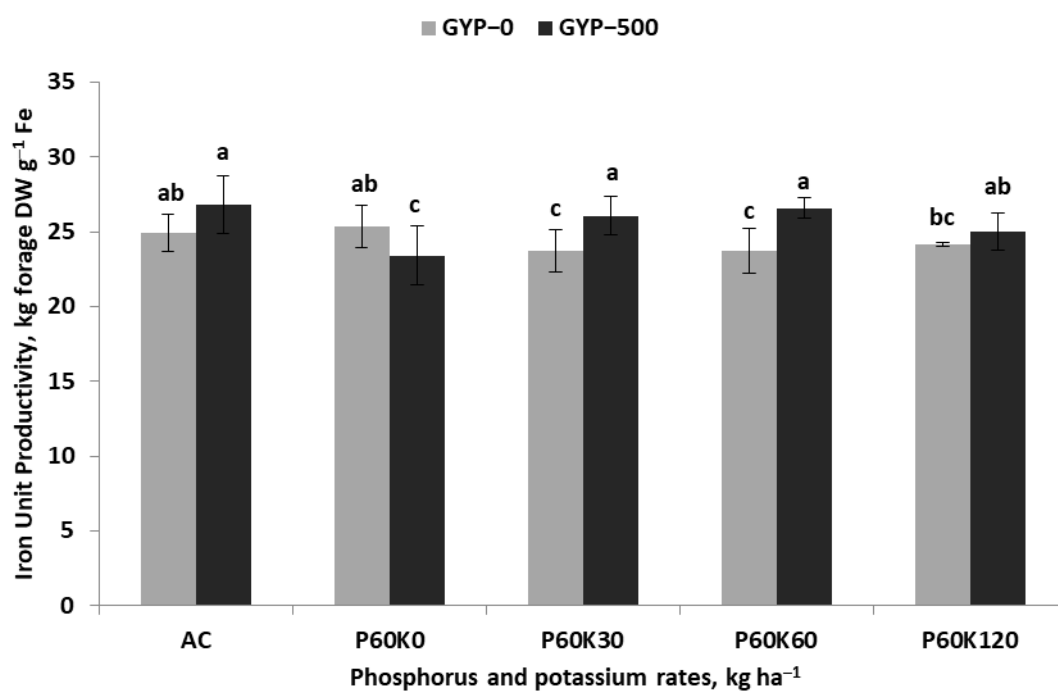

**Figure S7.** Effect of gypsum and phosphorus/potassium rates on iron unit productivity in the sward of the alfalfa–grass mixture. \*Similar letters indicate a lack of significant differences using Tukey’s test. The vertical bar in the column refers to the standard error of the mean.

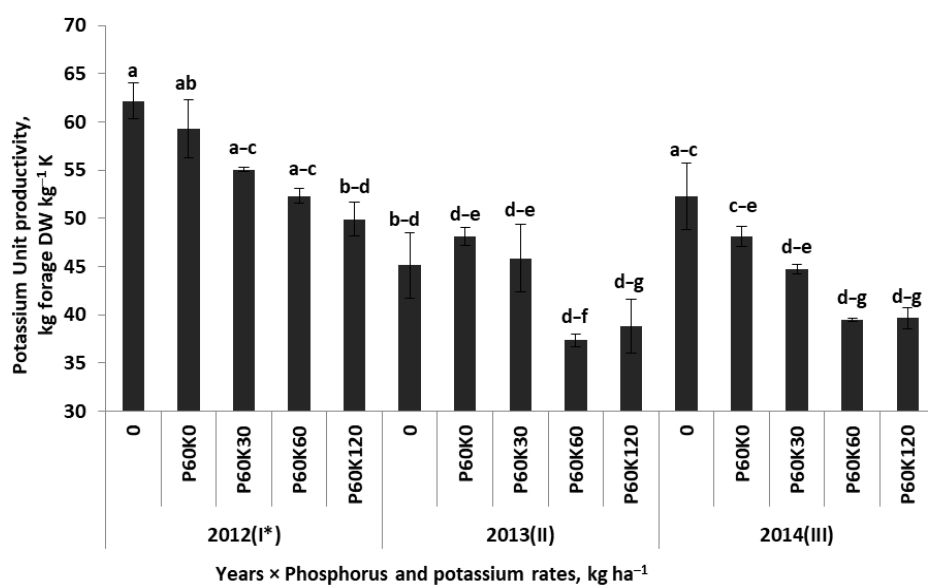

**Figure S8.** Effect of phosphorus/potassium rates in successive years on potassium unit productivity in the sward of the alfalfa–grass mixture. <sup>a</sup>Similar letters indicate a lack of significant differences using Tukey’s test. The vertical bar in the column refers to the standard error of the mean; \*first main season of the sward use.

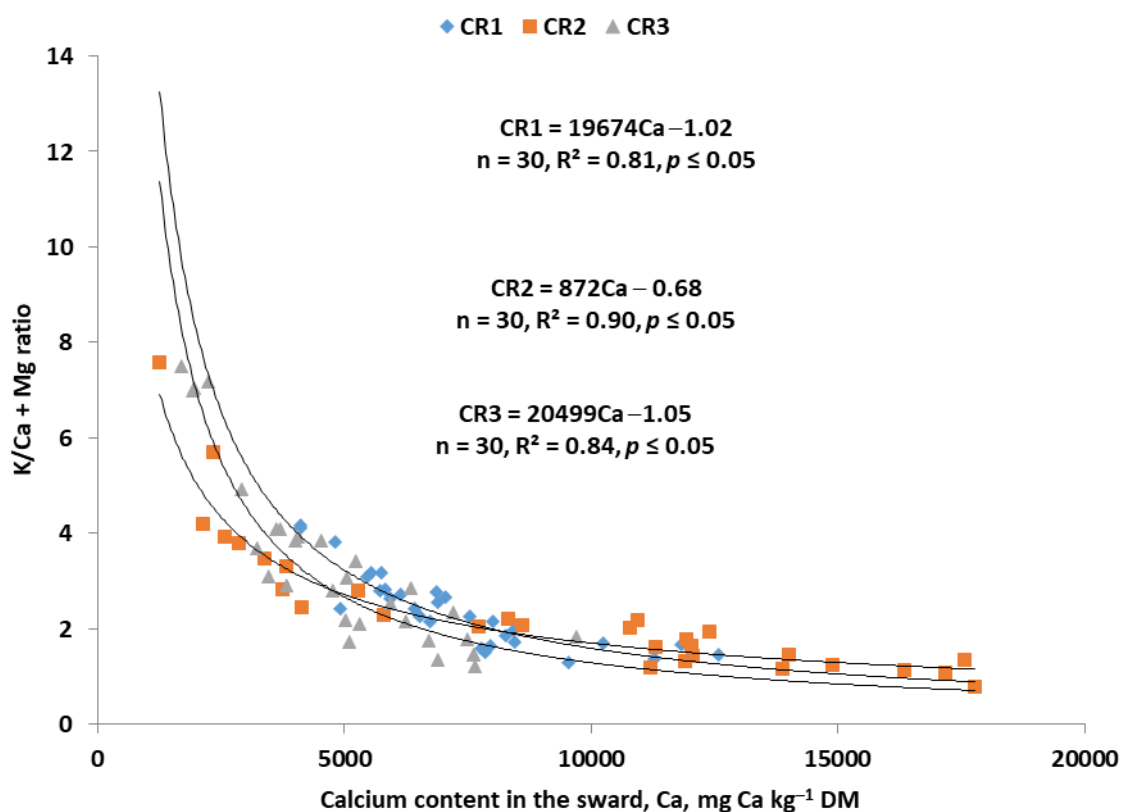

**Figure S9.** The relationship between the content of calcium and the K/Ca + Mg ratio in the successive cuts of the sward of the alfalfa–grass mixture.
